# Supplementary material
Source: PubMed Central journal article supplement (PMC3023552)
Supplement: supp_M011205_jlr.M011205-1.pdf [file supp_M011205_jlr.M011205-1.pdf]

Supplemental Table 1. Gene expression in liver and perigonadal WAT of WT and *Pnpla3*-KO mice.

| Pathway          | Gene   | Genotype | Liver                  |                         |                           |                        |              | Perigonadal WAT        |                        |                        |                        |              |
|------------------|--------|----------|------------------------|-------------------------|---------------------------|------------------------|--------------|------------------------|------------------------|------------------------|------------------------|--------------|
|                  |        |          | Chow                   | LFLS                    | LFHS                      | HFHS                   | p<0.05       | Chow                   | LFLS                   | LFHS                   | HFHS                   | p<0.05       |
| Pnpla family     | Pnpla3 | WT       | 1.00±0.25              | 29.08±8.10 <sup>d</sup> | 111.44±20.63 <sup>d</sup> | 15.38±2.13             | <b>g, d,</b> | 1.00±0.20              | 1.36±0.12              | 1.85±0.39 <sup>d</sup> | 0.87±0.23              | <b>g, d,</b> |
|                  |        | KO       | 0.00±0.00 <sup>g</sup> | 0.00±0.00 <sup>g</sup>  | 0.00±0.00 <sup>g</sup>    | 0.00±0.00 <sup>g</sup> | <b>gxd</b>   | 0.00±0.00 <sup>g</sup> | 0.00±0.00 <sup>g</sup> | 0.00±0.00 <sup>g</sup> | 0.00±0.00 <sup>g</sup> | <b>gxd</b>   |
|                  | Pnpla5 | WT       | 0.00±0.00              | 0.00±0.00               | 0.00±0.00                 | 0.00±0.00              |              | 1.00±0.26              | 1.33±0.20              | 1.78±0.31              | 1.02±0.22              | <b>g</b>     |
|                  |        | KO       | 0.00±0.00              | 0.00±0.00               | 0.00±0.00                 | 0.00±0.00              |              | 1.25±0.39              | 2.87±0.46 <sup>g</sup> | 3.12±0.47 <sup>g</sup> | 1.99±0.29 <sup>g</sup> |              |
| FA/TAG Synthesis | Acaca  | WT       | 1.00±0.22              | 1.40±0.18               | 4.20±0.80 <sup>d</sup>    | 1.71±0.29              | <b>d</b>     | 1.00±0.10              | 1.64±0.19 <sup>d</sup> | 1.80±0.11 <sup>d</sup> | 0.76±0.16              | <b>d</b>     |
|                  |        | KO       | 0.76±0.09              | 1.77±0.24               | 4.68±0.97 <sup>d</sup>    | 1.60±0.13              |              | 0.90±0.05              | 1.38±0.15 <sup>d</sup> | 1.58±0.16 <sup>d</sup> | 0.86±0.05              |              |
|                  | Fas    | WT       | 1.00±0.23              | 2.66±0.28               | 7.13±1.05 <sup>d</sup>    | 2.74±0.61              | <b>d</b>     | 1.00±0.04              | 2.04±0.33              | 2.36±0.28 <sup>d</sup> | 1.30±0.33              | <b>d</b>     |
|                  |        | KO       | 1.36±0.22              | 3.69±0.69               | 8.96±1.99 <sup>d</sup>    | 3.21±0.32              |              | 1.03±0.11              | 2.19±0.38 <sup>d</sup> | 2.29±0.32 <sup>d</sup> | 1.25±0.15              |              |
| G3P→LPA          | Gpat1  | WT       | 1.00±0.12              | 1.27±0.17               | 1.43±0.30                 | 1.47±0.25              | <b>d</b>     | 1.00±0.12              | 1.11±0.10              | 1.02±0.11              | 0.97±0.16              |              |
|                  |        | KO       | 0.83±0.12              | 1.22±0.17               | 2.03±0.42 <sup>d</sup>    | 1.32±0.14              |              | 1.24±0.15              | 1.03±0.08              | 1.14±0.12              | 0.88±0.06              |              |
|                  | Gpat3  | WT       | 1.00±0.16              | 0.92±0.06               | 0.96±0.11                 | 1.18±0.12              | <b>d</b>     | 1.00±0.18              | 0.86±0.06              | 0.97±0.07              | 0.85±0.06              |              |
|                  |        | KO       | 1.00±0.08              | 0.88±0.08               | 1.13±0.15                 | 1.28±0.09              |              | 1.01±0.14              | 0.90±0.06              | 0.82±0.04              | 1.03±0.08              |              |
|                  | Gpat4  | WT       | 1.00±0.13              | 0.95±0.09               | 0.90±0.12                 | 0.93±0.09              |              | 1.00±0.07              | 1.01±0.16              | 1.17±0.06              | 1.03±0.15              |              |
|                  |        | KO       | 0.96±0.10              | 0.88±0.11               | 1.00±0.09                 | 0.87±0.05              |              | 1.15±0.14              | 1.21±0.13              | 1.02±0.10              | 0.91±0.07              |              |
| LPA→PA           | Agpat1 | WT       | 1.00±0.20              | 1.73±0.15 <sup>d</sup>  | 1.65±0.18 <sup>d</sup>    | 1.58±0.13              | <b>d</b>     | 1.00±0.17              | 1.11±0.18              | 1.16±0.08              | 0.80±0.12              | <b>d</b>     |
|                  |        | KO       | 1.01±0.08              | 1.72±0.21 <sup>d</sup>  | 1.85±0.16 <sup>d</sup>    | 1.77±0.20 <sup>d</sup> |              | 1.10±0.15              | 1.04±0.06              | 1.02±0.07              | 0.85±0.07              |              |
|                  | Agpat2 | WT       | 1.00±0.04              | 1.00±0.10               | 1.29±0.10                 | 1.61±0.13 <sup>d</sup> | <b>d</b>     | 1.00±0.06              | 1.18±0.14              | 1.37±0.19              | 1.09±0.21              |              |
|                  |        | KO       | 1.02±0.06              | 0.81±0.12               | 1.30±0.17                 | 1.27±0.19              |              | 1.04±0.10              | 1.06±0.14              | 1.26±0.12              | 1.18±0.11              |              |

|                |               |           |           |                        |                        |                        |          |           |           |           |           |          |
|----------------|---------------|-----------|-----------|------------------------|------------------------|------------------------|----------|-----------|-----------|-----------|-----------|----------|
|                | <b>Agpat3</b> | <b>WT</b> | 1.00±0.20 | 1.11±0.15              | 1.20±0.06              | 1.55±0.14 <sup>d</sup> | <b>d</b> | 1.00±0.10 | 1.16±0.13 | 0.78±0.14 | 0.65±0.14 | <b>d</b> |
|                |               | <b>KO</b> | 0.97±0.12 | 1.20±0.11              | 1.49±0.08 <sup>d</sup> | 1.52±0.10 <sup>d</sup> |          | 1.06±0.08 | 1.06±0.13 | 0.93±0.08 | 0.75±0.06 |          |
|                | <b>Agpat4</b> | <b>WT</b> | 1.00±0.09 | 1.16±0.42              | 1.06±0.19              | 1.70±0.14              | <b>d</b> | 1.00±0.09 | 1.23±0.22 | 1.21±0.10 | 0.96±0.09 |          |
|                |               | <b>KO</b> | 0.75±0.16 | 1.18±0.14              | 1.33±0.24              | 1.56±0.21 <sup>d</sup> |          | 0.91±0.02 | 1.10±0.16 | 1.24±0.06 | 1.47±0.15 |          |
|                | <b>Agpat5</b> | <b>WT</b> | 1.00±0.09 | 1.03±0.11              | 1.04±0.11              | 1.22±0.09              |          | 1.00±0.13 | 0.89±0.12 | 0.87±0.19 | 1.00±0.12 |          |
|                |               | <b>KO</b> | 0.86±0.02 | 0.86±0.10              | 0.95±0.12              | 1.07±0.09              |          | 1.13±0.12 | 1.02±0.15 | 1.08±0.10 | 1.13±0.08 |          |
| PA→DAG         | <b>Pap1</b>   | <b>WT</b> | 1.00±0.06 | 1.47±0.19              | 2.02±0.27 <sup>d</sup> | 1.41±0.17              | <b>d</b> | 1.00±0.07 | 1.29±0.13 | 1.24±0.15 | 0.87±0.18 |          |
|                |               | <b>KO</b> | 0.89±0.09 | 1.72±0.27 <sup>d</sup> | 2.24±0.36 <sup>d</sup> | 1.92±0.28 <sup>d</sup> |          | 1.01±0.05 | 1.06±0.14 | 1.33±0.24 | 0.93±0.09 |          |
|                | <b>Pap2</b>   | <b>WT</b> | 1.00±0.10 | 1.42±0.18              | 1.27±0.30 <sup>d</sup> | 1.34±0.12              | <b>d</b> | 1.00±0.21 | 0.72±0.07 | 0.97±0.20 | 0.89±0.10 |          |
|                |               | <b>KO</b> | 0.81±0.11 | 1.32±0.23 <sup>d</sup> | 1.46±0.22 <sup>d</sup> | 1.64±0.15 <sup>d</sup> |          | 0.96±0.15 | 0.72±0.13 | 0.97±0.15 | 0.83±0.17 |          |
|                | <b>Pap3</b>   | <b>WT</b> | 0.00±0.00 | 0.00±0.00              | 0.00±0.00              | 0.00±0.00              |          | 1.00±0.15 | 0.93±0.15 | 1.05±0.10 | 0.90±0.13 |          |
|                |               | <b>KO</b> | 0.00±0.00 | 0.00±0.00              | 0.00±0.00              | 0.00±0.00              |          | 1.04±0.13 | 0.62±0.06 | 0.82±0.08 | 0.79±0.06 |          |
| DAG→TAG        | <b>Dgat1</b>  | <b>WT</b> | 1.00±0.05 | 0.83±0.12              | 0.94±0.08              | 1.74±0.23 <sup>d</sup> | <b>d</b> | 1.00±0.03 | 1.24±0.24 | 1.48±0.08 | 1.12±0.18 |          |
|                |               | <b>KO</b> | 0.92±0.11 | 0.88±0.09              | 1.12±0.10              | 1.92±0.27 <sup>d</sup> |          | 1.05±0.07 | 1.25±0.20 | 1.27±0.10 | 1.16±0.09 |          |
|                | <b>Dgat2</b>  | <b>WT</b> | 1.00±0.09 | 1.27±0.11              | 1.65±0.21 <sup>d</sup> | 1.55±0.13 <sup>d</sup> | <b>d</b> | 1.00±0.06 | 0.92±0.15 | 0.98±0.11 | 0.79±0.13 |          |
|                |               | <b>KO</b> | 0.83±0.05 | 1.24±0.12              | 2.13±0.29 <sup>d</sup> | 1.31±0.07              |          | 0.95±0.01 | 0.86±0.10 | 0.94±0.08 | 0.89±0.08 |          |
| TAG hydrolysis | <b>Pnpla2</b> | <b>WT</b> | 1.00±0.17 | 1.36±0.16              | 1.42±0.23              | 1.70±0.30 <sup>d</sup> | <b>d</b> | 1.00±0.29 | 1.16±0.19 | 1.26±0.22 | 0.76±0.22 |          |
|                |               | <b>KO</b> | 0.94±0.05 | 1.17±0.10              | 1.61±0.26 <sup>d</sup> | 1.42±0.07              |          | 1.13±0.20 | 1.15±0.16 | 0.99±0.07 | 0.87±0.10 |          |
|                | <b>HSL</b>    | <b>WT</b> | 1.00±0.19 | 1.01±0.13              | 0.94±0.12              | 1.25±0.08              |          | 1.00±0.10 | 1.01±0.16 | 0.92±0.11 | 0.84±0.14 |          |
|                |               | <b>KO</b> | 0.83±0.06 | 0.95±0.10              | 1.11±0.17              | 1.14±0.12              |          | 1.09±0.09 | 1.00±0.07 | 0.99±0.06 | 1.02±0.09 |          |

Experimental information is provided in the legend for Fig. 7. Significant main effects ( $p < 0.05$ ) of diet ( $d$ ) and genotype ( $g$ ) as well as interactions between diet and genotype ( $d \times g$ ) are indicated in the right-hand column for each tissue. Where significant main effects were identified, simple effects for pairwise comparisons are indicated as superscripts ( $^d$  for effect of diet;  $^g$  for effect of genotype) where appropriate. For simple effects of diet, only comparisons with the chow-fed control group within a given genotype group are shown for clarity. Abbreviations are as follows: Acaca, acetyl-CoA carboxylase; Agpat, acyl glycerol acyltransferase; DAG, diacylglycerol; Dgat, diacylglycerol acyltransferase; Fas, fatty acid synthase; G3P, glycerol 3-phosphate; HSL, hormone sensitive lipase; LPA, lysophosphatidic acid; PA, phosphatidic acid; Pap, phosphatidic acid phosphatase; Pnpla, patatin-like phospholipase domain containing protein.  $p < 0.05$  for main and simple effects using factorial ANOVA.
